# Supplementary material for: Accuracy Assessment of Five Equations Used for Estimating the Glomerular Filtration Rate in Korean Adults
Source: PubMed Central journal article supplement — Ann Lab Med. 2017 Jun 20;37(5):371–80. doi: 10.3343/alm.2017.37.5.371 (PMC5500735; doi:10.3343/alm.2017.37.5.371), 2017-06-20
Supplement: alm-37-371-s001.pdf [file alm-37-371-s001.pdf]

## SUPPLEMENTAL MATERIAL

To determine the reference interval and median serum creatinine concentration from the healthy Korean adult population, we used the Korea National Health and Nutrition Examination Survey (KNHANES VI, 2013-2015) data. The target population of the KNHANES comprises non-institutionalized Korean citizens residing in Korea. We selected healthy adults as the reference individuals using step-by-step selection criteria from the KNHANES VI data. In KNHANES VI, the serum creatinine concentration was measured using a rate-blanked compensated kinetic Jaffe method that is IDMS-traceable (Roche Diagnostics, Indianapolis, IN, USA) on a Hitachi automatic chemistry analyzer (Hitachi, Tokyo, Japan).

**Supplemental Table S1.** Korean healthy adult selection process from the Korea National Health and Nutrition Examination Survey (KNHANES VI, 2013–2015) data

| Step                                      | Exclusion criteria                                     | 2013 (N=8,018)                               | 2014 (N=7,550) | 2015 (N=7,380) |
|-------------------------------------------|--------------------------------------------------------|----------------------------------------------|----------------|----------------|
|                                           |                                                        | Number of excluded participants at each step |                |                |
| 1                                         | Age <20 yr old                                         | 1,990                                        | 1,653          | 1,525          |
| 2                                         | Missing data (health questionnaire)                    | 579                                          | 535            | 365            |
| 3                                         | Missing data (serum creatinine)                        | 513                                          | 570            | 350            |
| 4                                         | Missing data (dipstick urinalysis)                     | 301                                          | 263            | 219            |
| 5                                         | History of hypertension                                | 952                                          | 937            | 1,207          |
| 6                                         | History of diabetes                                    | 161                                          | 140            | 157            |
| 7                                         | History of dyslipidemia                                | 237                                          | 253            | 283            |
| 8                                         | History of stroke                                      | 15                                           | 24             | 18             |
| 9                                         | History of acute myocardial infarction                 | 7                                            | 5              | 10             |
| 10                                        | History of angina                                      | 19                                           | 20             | 20             |
| 11                                        | Current smoking                                        | 747                                          | 666            | 626            |
| 12                                        | High blood pressure*                                   | 269                                          | 212            | 252            |
| 13                                        | Hemoglobin A1c $\geq$ 6.5%                             | 72                                           | 81             | 64             |
| 14                                        | Body mass index $>$ 30.0 or $<$ 18.5 kg/m <sup>2</sup> | 163                                          | 204            | 184            |
| 15                                        | Proteinuria on dipstick $\geq$ 1 <sup>†</sup>          | 11                                           | 6              | 14             |
| 16                                        | Glucosuria on dipstick $\geq$ 1 <sup>†</sup>           | 3                                            | 7              | 6              |
| 17                                        | Outliers <sup>†</sup>                                  | 18                                           | 20             | 14             |
| Total number of participants (%)          |                                                        | 8,018 (100)                                  | 7,550 (100)    | 7,380 (100)    |
| Total number of excluded participants (%) |                                                        | 6,057 (76)                                   | 5,596 (74)     | 5,314 (72)     |
| Final enrollment (%)                      |                                                        | 1,961 (24)                                   | 1,954 (26)     | 2,066 (28)     |

\*systolic blood pressure  $\geq$  140 mm Hg or diastolic blood pressure  $\geq$  90 mm Hg. <sup>†</sup>Three methods (visual inspection, D/R rule [absolute difference between extreme result and the next largest or smallest result/range of all observations including extreme results], and Tukey rule) were used to detect outliers according to the CLSI document EP28-A3c (CLSI. Defining, Establishing, and Verifying Reference Intervals in the Clinical Laboratory; Approved Guideline-Third Edition. CLSI document EP28-A3c. Wayne, PA: Clinical and Laboratory Standards Institute; 2008.).
