# Supplementary material for: Accuracy Assessment of Five Equations Used for Estimating the Glomerular Filtration Rate in Korean Adults
Source: PubMed Central journal article supplement — Ann Lab Med. 2017 Jun 20;37(5):371–80. doi: 10.3343/alm.2017.37.5.371 (PMC5500735; doi:10.3343/alm.2017.37.5.371), 2017-06-20
Supplement: alm-37-371-s002.pdf [file alm-37-371-s002.pdf]

**Supplemental Table S2.** Reference interval of serum creatinine in adult Koreans: data from the Korea National Health and Nutrition Examination Survey (KNHANES VI, 2013–2015)

| Year  | Males |               |               | Females |               |               |
|-------|-------|---------------|---------------|---------|---------------|---------------|
|       | N     | Lower (mg/dL) | Upper (mg/dL) | N       | Lower (mg/dL) | Upper (mg/dL) |
| 2013  | 601   | 0.74          | 1.18          | 1,360   | 0.53          | 0.90          |
| 2014  | 574   | 0.71          | 1.16          | 1,380   | 0.52          | 0.89          |
| 2015  | 670   | 0.75          | 1.19          | 1,396   | 0.51          | 0.92          |
| Total | 1,845 | 0.73          | 1.18          | 4,136   | 0.52          | 0.90          |

The reference interval was established according to the CLSI document EP28-A3C (CLSI. Defining, Establishing, and Verifying Reference Intervals in the Clinical Laboratory; Approved Guideline-Third Edition. CLSI document EP28-A3c. Wayne, PA: Clinical and Laboratory Standards Institute; 2008.).
