# Supplementary material for: Accuracy Assessment of Five Equations Used for Estimating the Glomerular Filtration Rate in Korean Adults
Source: PubMed Central journal article supplement — Ann Lab Med. 2017 Jun 20;37(5):371–80. doi: 10.3343/alm.2017.37.5.371 (PMC5500735; doi:10.3343/alm.2017.37.5.371), 2017-06-20
Supplement: alm-37-371-s003.pdf [file alm-37-371-s003.pdf]

**Supplemental Table S3.** Median serum creatinine concentrations in adult Koreans: data from the Korea National Health and Nutrition Examination Survey (KNHANES VI, 2013–2015)

| Year  | Males |                         |        | Females |                         |        |
|-------|-------|-------------------------|--------|---------|-------------------------|--------|
|       | N     | Median serum creatinine |        | N       | Median serum creatinine |        |
|       |       | mg/dL                   | μmol/L |         | mg/dL                   | μmol/L |
| 2013  | 601   | 0.97                    | 86     | 1,360   | 0.70                    | 62     |
| 2014  | 574   | 0.94                    | 83     | 1,380   | 0.69                    | 61     |
| 2015  | 670   | 0.97                    | 86     | 1,396   | 0.71                    | 63     |
| Total | 1,845 | 0.96                    | 85     | 4,136   | 0.70                    | 62     |
